# Supplementary material for: Association of a Simplified Finnegan Neonatal Abstinence Scoring Tool With the Need for Pharmacologic Treatment for Neonatal Abstinence Syndrome
Source: PubMed Central journal article supplement (PMC7142377; doi:10.1001/jamanetworkopen.2020.2275), 2020-04-08
Supplement: jamanetwopen-3-e202275-s001.pdf [file jamanetwopen-3-e202275-s001.pdf]

## Supplementary Online Content

Devlin LA, Breeze JL, Terrin N, et al. Association of a simplified Finnegan Neonatal Abstinence Scoring Tool with the need for pharmacologic treatment for neonatal abstinence syndrome. *JAMA Netw Open*. 2020;3(4):e202275. doi:10.1001/jamanetworkopen.2020.2275

**eFigure.** Flow Diagram for Patient Inclusion

**eTable.** Simplified FNAST Evaluation Tool

This supplementary material has been provided by the authors to give readers additional information about their work.

**eFigure. Flow Diagram for Patient Inclusion**

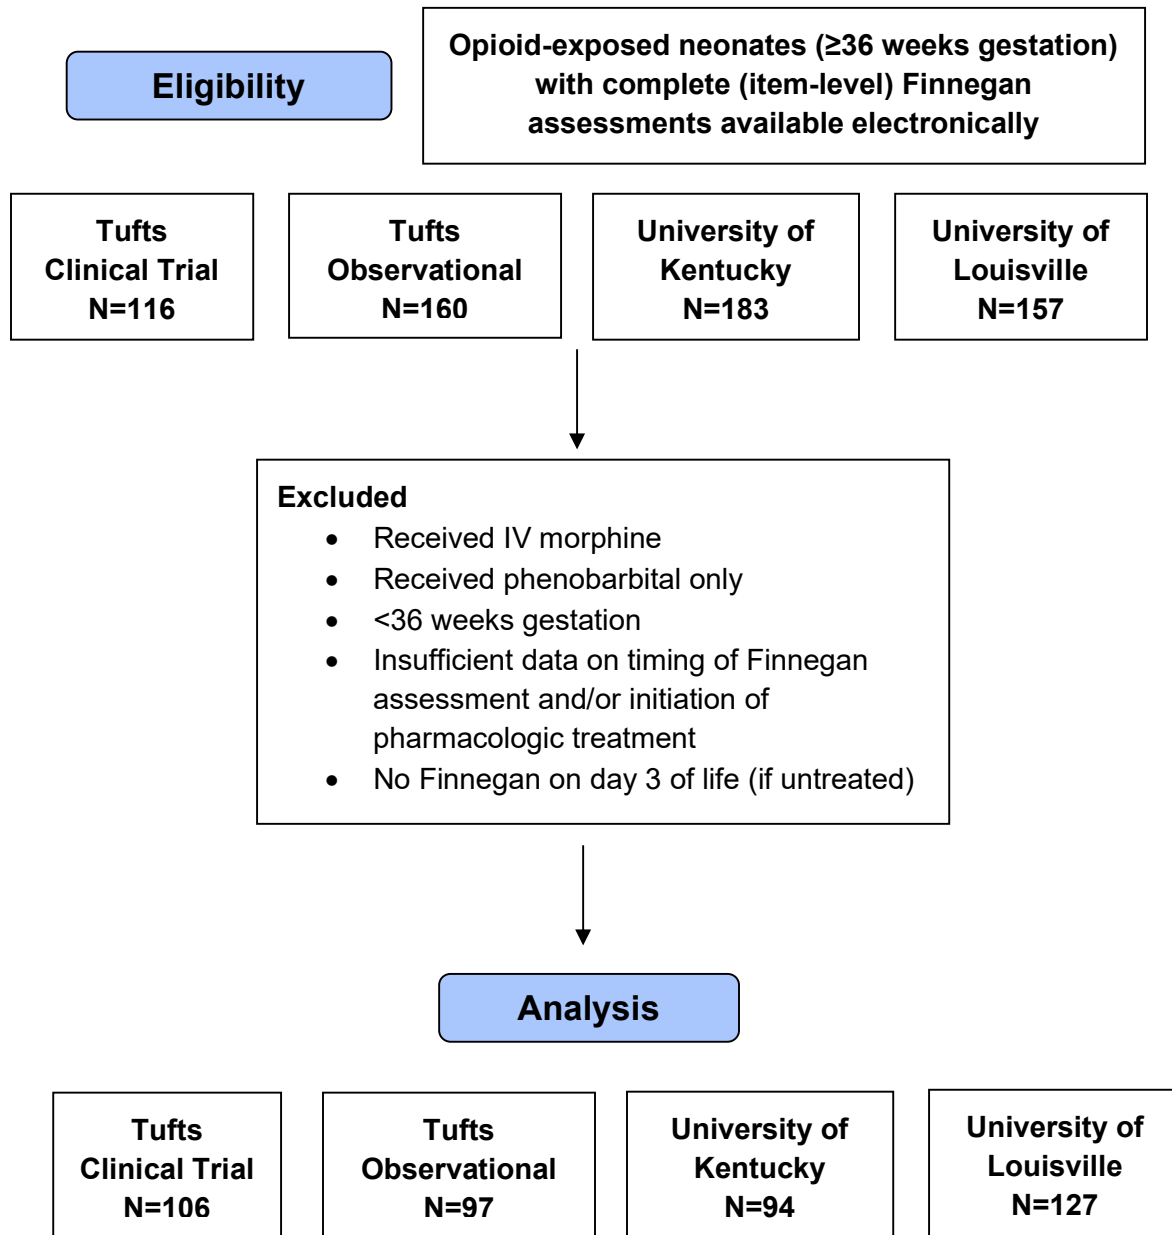

**eTable. Simplified FNAST Evaluation Tool**

| Item                                                                                                                                                                                                       |                                                                     | Score              |
|------------------------------------------------------------------------------------------------------------------------------------------------------------------------------------------------------------|---------------------------------------------------------------------|--------------------|
| <b>Sleeps &lt;3 Hours After Feeding</b>                                                                                                                                                                    | <input type="checkbox"/> Present<br><input type="checkbox"/> Absent | 1                  |
| <b>Any Tremors</b>                                                                                                                                                                                         | <input type="checkbox"/> Present<br><input type="checkbox"/> Absent | 1                  |
| <b>Increased Muscle Tone</b>                                                                                                                                                                               | <input type="checkbox"/> Present<br><input type="checkbox"/> Absent | 1                  |
| <b>Fever <math>\geq 37.2^{\circ}\text{C}</math></b>                                                                                                                                                        | <input type="checkbox"/> Present<br><input type="checkbox"/> Absent | 1                  |
| <b>Respiratory Rate <math>&gt;60/\text{min}</math></b>                                                                                                                                                     | <input type="checkbox"/> Present<br><input type="checkbox"/> Absent | 1                  |
| <b>Excessive Sucking</b>                                                                                                                                                                                   | <input type="checkbox"/> Present<br><input type="checkbox"/> Absent | 1                  |
| <b>Poor Feeding</b>                                                                                                                                                                                        | <input type="checkbox"/> Present<br><input type="checkbox"/> Absent | 1                  |
| <b>Regurgitation</b>                                                                                                                                                                                       | <input type="checkbox"/> Present<br><input type="checkbox"/> Absent | 1                  |
| <b>During the assessment period:<br/>           Patient receives a score of 1 if an item is present or a score 0 if item is absent<br/>           Total Score is the sum of all items that are present</b> |                                                                     | <b>Total Score</b> |
